# Supplementary material for: Implementation and Cross-Validation of a Pharmacokinetic Model for Precision Dosing of Busulfan in Hematopoietic Stem Cell Transplanted Children
Source: MDPI journal article supplement (doi:10.3390/pharmaceutics14102107), 2022-10-01
Supplement: s1 [file s1]

## Paci *et al.* [16]

Model with IOV

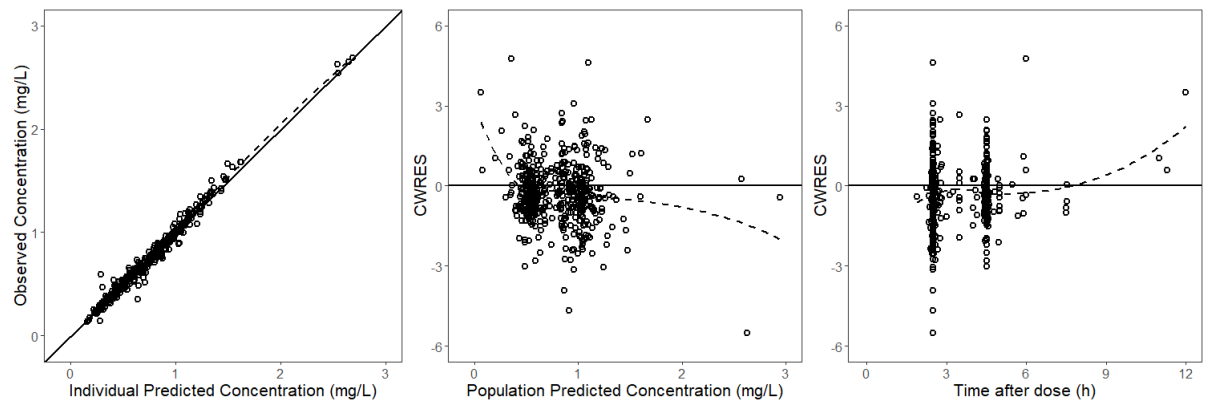

Model without IOV

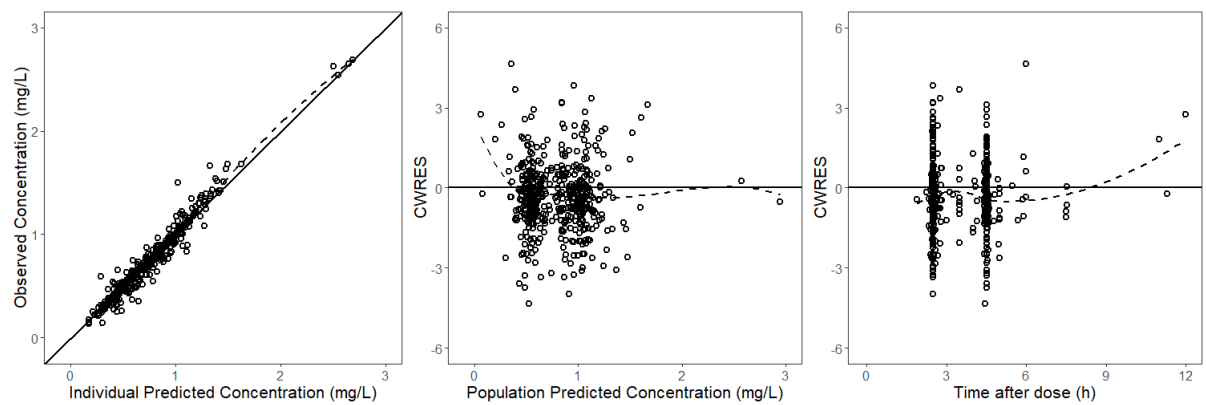

## Booth *et al.* [18]

Model with IOV

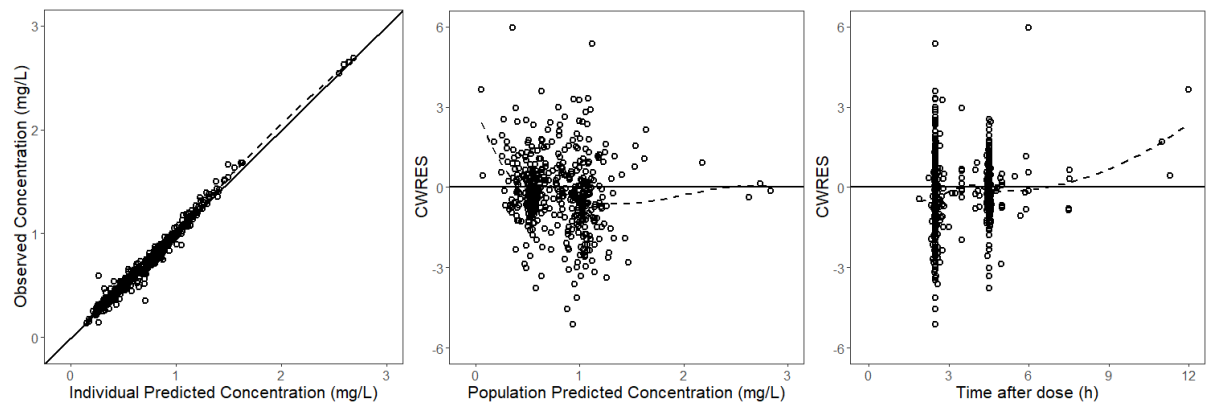

Model without IOV

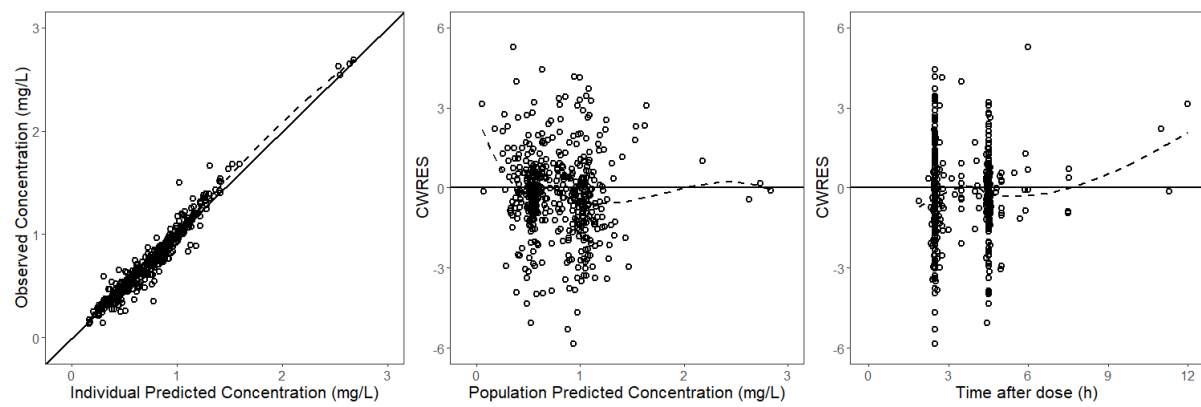

## Trame *et al.* [19]

### Model with IOV

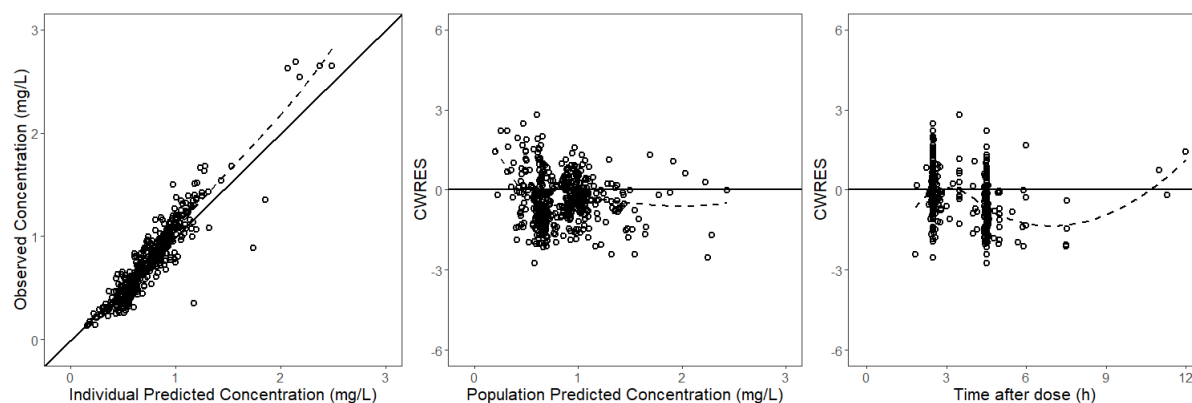

### Model without IOV

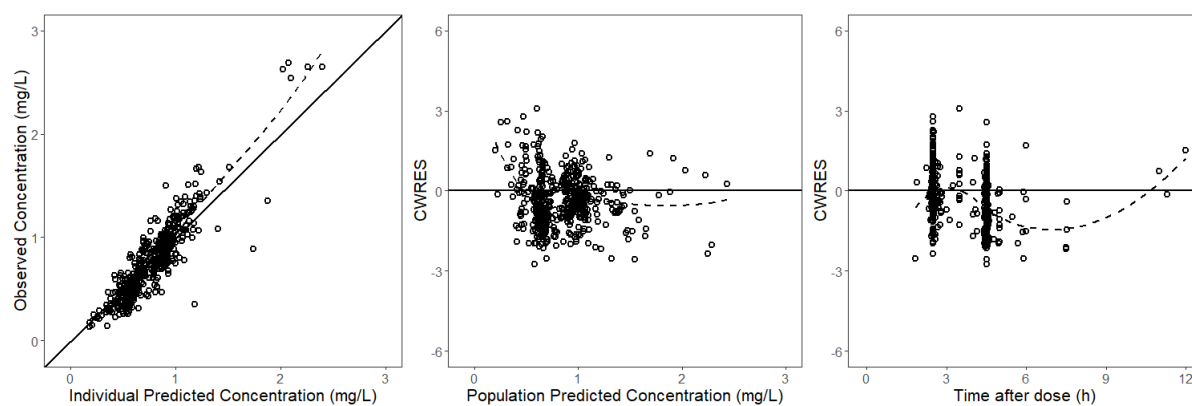

Figure S1: Goodness-of-fit plots of the candidate popPK models with (upper panel) and without (lower panel) interoccasion variability (IOV). Black continuous lines represent identity and ordinate value zero curves as appropriate, dashed lines the loess smooth curves. CWRES, conditional weighted residuals.
